# Supplementary material
Source: PubMed Central journal article supplement (PMC5610508)
Supplement: AAC.00670-17_zac010176555s1.pdf [file AAC.00670-17_zac010176555s1.pdf]

740 **Supplementary Figures and Tables**

741

742 **Table S1.** Strains used in this study and their respective MIC distributions.

| Strain ID    | Group       | MIC Etest ( $\mu\text{g/ml}$ ) |            | MIC EUCAST ( $\mu\text{g/ml}$ ) |       |
|--------------|-------------|--------------------------------|------------|---------------------------------|-------|
|              |             | Mean                           | Range      | Mean                            | Range |
| <b>T9</b>    | <b>ATR</b>  | 32                             | 32         | 2                               | 2-4   |
| <b>T90</b>   | <b>ATR</b>  | 32                             | 32         | 2                               | 2-4   |
| <b>T5</b>    | <b>ATR</b>  | 32                             | 32         | 4                               | 2-4   |
| <b>T164</b>  | <b>ATS</b>  | 0,19                           | 0.012-0.19 | 0,5                             | 0,5-1 |
| <b>T175</b>  | <b>ATS</b>  | 0,19                           | 0.094-0.19 | 0,5                             | 0,5-1 |
| <b>T77</b>   | <b>ATS</b>  | 0,19                           | 0.094-0.25 | 0,5                             | 0,5-1 |
| <b>Afl25</b> | <b>AFLR</b> | 32                             | 32         | 8                               | 4-8   |
| <b>Afl22</b> | <b>AFLR</b> | 32                             | 32         | 2                               | 2     |
| <b>Afl20</b> | <b>AFLS</b> | 8                              | 8          | 8                               | 4-8   |

743

744 **Table S2.** Primers used in this study.

| locus tag  | gene ID       | sequence 5' - 3'                          | amplicon size |
|------------|---------------|-------------------------------------------|---------------|
| ATEG_06543 | <i>sod1</i>   | GGCTCCAAGCAGGACAAG<br>CTTGGACTCCTCGTTGCC  | 117           |
| ATEG_03920 | <i>sod2</i>   | GGCTCGTCAAGGACAAGC<br>TAAGCGTGCTCCCAAGCG  | 115           |
| ATEG_00657 | <i>sod3</i>   | GCTGCTAGATTCACCCTC<br>GCGTTGAGGTTGGTGATG  | 125           |
| ATEG_03712 | <i>sod4</i>   | CAACTACGCCTCGATGGC<br>AGAGGAGCAGGTGTCGAC  | 109           |
| ATEG_09123 | <i>sod5</i>   | GCGGAGTGGGCATCATAG<br>ACGGATCGAGGTGCTTGC  | 132           |
| ATEG_00356 | <i>sod6</i>   | ACCGACAGCCCTATAGGC<br>CGCGTAGCAGTTGCCATC  | 118           |
| ATEG_04404 | <i>sod7</i>   | AGGATACAGGTCGCGACG<br>GAGACCTGCACCATTCGC  | 130           |
| ATEG_07477 | <i>cat1</i>   | TCCAGCGGTTTCGATCACG<br>GAAGCGGCCGTGATGTTG | 125           |
| ATEG_08422 | <i>cat2</i>   | GACCTGGAGGCTCTCATG<br>AAGACACGGTAGGTGCCG  | 113           |
| ATEG_01487 | <i>catC</i>   | TGGCCAAAGACGACGAGC<br>CCTGAAGGAGCAGAGGAC  | 132           |
| ATEG_00794 | <i>catA</i>   | CGTCGACAACCAGCACTC<br>CTTTGAGGCGGAAGGTCC  | 143           |
| ATEG_07460 | <i>percat</i> | CGTCCTGCTGCAAGACAC<br>ATGCTGGAACCCACCCAG  | 107           |
| ATEG_00287 | <i>tub</i>    | CTTTCCGTCCACCAGCTC<br>GAGGGGTTGGAGAGCTTG  | 104           |

745

746

747 **Table S3.** Protein identities of genes encoding SOD homologs of *C. albicans*, *A. fumigatus* and *A.*  
 748 *terreus*. Protein identities (percent identity) were calculated with ClustalOmega.

| organism            | description | locus tag    | <i>A. terreus</i> |              |              |              |              |              |              | <i>A. fumigatus</i> |              |              |              |              |              | <i>C. albicans</i> |              |              |              |              |              |
|---------------------|-------------|--------------|-------------------|--------------|--------------|--------------|--------------|--------------|--------------|---------------------|--------------|--------------|--------------|--------------|--------------|--------------------|--------------|--------------|--------------|--------------|--------------|
|                     |             |              | SOD1              | SOD2         | SOD3         | SOD4         | SOD5         | SOD6         | SOD7         | SOD1                | SOD2         | SOD3         | SOD4         | SOD1         | SOD2         | SOD3               | SOD4         | SOD5         | SOD6         |              |              |
|                     |             |              | ATEG_06543        | ATEG_03920   | ATEG_00657   | ATEG_03712   | ATEG_09123   | ATEG_00356   | ATEG_04404   | AFUA_5G09240        | AFUA_4G14500 | AFUA_1G14550 | AFUA_6G07210 | AFUA_1G11640 | AFUA_2G09700 | SOD1Ca             | SOD2Ca       | SOD3Ca       | SOD4Ca       | SOD5Ca       | SOD6Ca       |
| <i>A. terreus</i>   | SOD1        | ATEG_06543   | 100               | 14,40        | 14,53        | 14,29        | 20,14        | 20,28        | 17,99        | <b>85,44</b>        | 15,08        | 15,65        | 13,57        | 16,33        | 15,83        | <b>73,38</b>       | 9,09         | 14,17        | 24,46        | 23,02        | 22,54        |
|                     | SOD2        | ATEG_03920   | 14,40             | 100          | 48,73        | 25,11        | 12,21        | 13,64        | 12,5         | 13,82               | <b>88,55</b> | 50,77        | 23,74        | 11,25        | 11,81        | 13,33              | <b>53,33</b> | <b>49,75</b> | 12,93        | 9,86         | 11,9         |
|                     | SOD3        | ATEG_00657   | 14,53             | 48,73        | 100          | 21,67        | 12,73        | 8,93         | 8,47         | 15,38               | 49,49        | <b>63,94</b> | 23,15        | 11,11        | 8,47         | 11,97              | 42,79        | <b>44,78</b> | 8,40         | 9,52         | 7,01         |
|                     | SOD4        | ATEG_03712   | 14,29             | 25,11        | 21,67        | 100          | 14,89        | 15,38        | 16,25        | 13,97               | 25,00        | 20,2         | <b>90,60</b> | 11,63        | 15,62        | 12,12              | 21,88        | 21,61        | 15,57        | 14,81        | 13,00        |
|                     | SOD5        | ATEG_09123   | 20,14             | 12,21        | 12,73        | 14,89        | 100          | 51,91        | 18,29        | 22,14               | 10,61        | 12,96        | 13,89        | <b>40,54</b> | 17,07        | 20,44              | 9,63         | 14,78        | <b>34,12</b> | 33,14        | <b>30,11</b> |
|                     | SOD6        | ATEG_00356   | 20,28             | 13,64        | 8,93         | 15,38        | 51,91        | 100          | 16,15        | 21,58               | 12,03        | 10,00        | 15,07        | <b>41,40</b> | 16,15        | 20,59              | 10,29        | 14,53        | <b>34,12</b> | <b>33,73</b> | 28,98        |
|                     | SOD7        | ATEG_04404   | 17,99             | 12,5         | 8,47         | 16,25        | 18,29        | 16,15        | 100          | 19,26               | 13,10        | 10,34        | 15,85        | 13,51        | <b>85,83</b> | 19,85              | 13,42        | 10,74        | 20,11        | 17,14        | 13,83        |
| <i>A. fumigatus</i> | SOD1        | AFUA_5G09240 | <b>85,44</b>      | 13,82        | 15,38        | 13,97        | 22,14        | 21,58        | 19,26        | 100                 | 13,71        | 14,78        | 13,24        | 19,01        | 17,04        | <b>72,73</b>       | 10,16        | 15,00        | 23,7         | 25,93        | 23,19        |
|                     | SOD2        | AFUA_4G14500 | 15,08             | <b>88,55</b> | 49,49        | 25,00        | 10,61        | 12,03        | 13,10        | 13,71               | 100          | 51,53        | 24,09        | 11,18        | 12,41        | 13,22              | <b>53,3</b>  | <b>51,98</b> | 12,16        | 9,09         | 11,18        |
|                     | SOD3        | AFUA_1G14550 | 15,65             | 50,77        | <b>63,94</b> | 20,20        | 12,96        | 10,00        | 10,34        | 14,78               | 51,53        | 100          | 21,67        | 12,03        | 11,21        | 15,65              | 49,75        | 51,76        | 10,69        | 10,32        | 9,55         |
|                     | SOD4        | AFUA_6G07210 | 13,57             | 23,74        | 23,15        | <b>90,60</b> | 13,89        | 15,07        | 15,85        | 13,24               | 24,09        | 21,67        | 100          | 11,43        | 15,3         | 11,36              | 21,88        | 22,11        | 14,71        | 13,94        | 13,3         |
|                     |             | AFUA_1G11640 | 16,33             | 11,25        | 11,11        | 11,63        | <b>40,54</b> | <b>41,40</b> | 13,51        | 19,01               | 11,18        | 12,03        | 11,43        | 100          | 13,51        | 20,29              | 12,73        | 12,14        | <b>30,73</b> | <b>29,10</b> | <b>30,54</b> |
|                     |             | AFUA_2G09700 | 15,83             | 11,81        | 8,47         | 15,62        | 17,07        | 16,15        | <b>85,83</b> | 17,04               | 12,41        | 11,21        | 15,3         | 13,51        | 100          | 17,56              | 12,75        | 10,74        | 20,67        | 17,14        | 14,89        |
| <i>C. albicans</i>  | SOD1        | SOD1Ca       | <b>73,38</b>      | 13,33        | 11,97        | 12,12        | 20,44        | 20,59        | 19,85        | <b>72,73</b>        | 13,22        | 15,65        | 11,36        | 20,29        | 17,56        | 100                | 12,10        | 15,00        | 25,00        | 25,00        | 24,44        |
|                     | SOD2        | SOD2Ca       | 9,09              | <b>53,33</b> | 42,79        | <b>21,88</b> | 9,63         | 10,29        | 13,42        | 10,16               | <b>53,3</b>  | 49,75        | <b>21,88</b> | 12,73        | 12,75        | 12,10              | 100          | 61,17        | 11,11        | 7,43         | 10,4         |
|                     | SOD3        | SOD3Ca       | 14,17             | 49,75        | <b>44,78</b> | 21,61        | 14,78        | 14,53        | 10,74        | 15,00               | 51,98        | <b>51,76</b> | 22,11        | 12,14        | 10,74        | 15,00              | 61,17        | 100          | 15,67        | 13,18        | 11,76        |
|                     | SOD4        | SOD4Ca       | 24,46             | 12,93        | 8,40         | 15,57        | <b>34,12</b> | <b>34,12</b> | <b>20,11</b> | 23,70               | 12,16        | 10,69        | 14,71        | <b>30,73</b> | <b>20,67</b> | 25,00              | 11,11        | 15,67        | 100          | 66,96        | 32,33        |
|                     | SOD5        | SOD5Ca       | 23,02             | 9,86         | 9,52         | 14,81        | 33,14        | 33,73        | 17,14        | 25,93               | 9,09         | 10,32        | 13,94        | 29,10        | 17,14        | 25,00              | 7,43         | 13,18        | 66,96        | 100          | 33,04        |
|                     | SOD6        | SOD6Ca       | 22,54             | 11,90        | 7,01         | 13,00        | 30,11        | 28,98        | 13,83        | 23,19               | 11,18        | 9,55         | 13,3         | 30,54        | 14,89        | 24,44              | 10,4         | 11,76        | 32,33        | 33,04        | 100          |

749

AmB resistance and ROS in *A. terreus*

750 **Table S4.** Protein identities of genes encoding CAT homologs *C. albicans*, *A. fumigatus* and *A.*  
 751 *terreus*. Protein identities (percent identity) were calculated with ClustalOmega.  
 752

| organism            | description     | organism<br>description<br>locus tag | <i>A. terreus</i>  |                    |                    |                    |                      | <i>A. fumigatus</i>  |                      |                      |                      |                                 | <i>C. albicans</i> |
|---------------------|-----------------|--------------------------------------|--------------------|--------------------|--------------------|--------------------|----------------------|----------------------|----------------------|----------------------|----------------------|---------------------------------|--------------------|
|                     |                 |                                      | CAT1<br>ATEG_07477 | CAT2<br>ATEG_08422 | CATC<br>ATEG_01487 | CATA<br>ATEG_00794 | Percat<br>ATEG_07460 | CAT1<br>AFUA_3G02270 | CAT2<br>AFUA_8G01670 | EasC<br>AUFA_2G18030 | CATA<br>AFUA_6G03890 | putative<br>CAT<br>AFUA_2G00200 | CAT1<br>Ca         |
| <i>A. terreus</i>   | CAT1            | ATEG_07477                           | 100                | 16,87              | 35,96              | 38,83              | 31,11                | 82,39                | 16,13                | 30,91                | 38,84                | 32,42                           | 35,6               |
|                     | CAT2            | ATEG_08422                           | 16,87              | 100                | 15,07              | 16,73              | 12,86                | 16,47                | 81,99                | 13,73                | 16,07                | 16,52                           | 14,36              |
|                     | CATC            | ATEG_01487                           | 35,96              | 15,07              | 100                | 37,86              | 48,67                | 35,33                | 14,35                | 45,47                | 36,71                | 38,66                           | 60,46              |
|                     | CATA            | ATEG_00794                           | 38,83              | 16,73              | 37,86              | 100                | 32,06                | 40,54                | 16,3                 | 31,28                | 83,06                | 31,06                           | 38,64              |
|                     | Percat          | ATEG_07460                           | 31,11              | 12,86              | 48,67              | 32,06              | 100                  | 30,49                | 13,16                | 39,43                | 32,18                | 32,03                           | 41,87              |
| <i>A. fumigatus</i> | CAT1            | AFUA_3G02270                         | 82,39              | 16,47              | 35,33              | 40,54              | 30,49                | 100                  | 15,75                | 31,92                | 40,18                | 32,32                           | 36,32              |
|                     | CAT2            | AFUA_8G01670                         | 16,13              | 81,99              | 14,35              | 16,3               | 13,16                | 15,75                | 100                  | 13,97                | 15,67                | 14,87                           | 13,88              |
|                     | EasC            | AUFA_2G18030                         | 30,91              | 13,73              | 45,47              | 31,28              | 39,43                | 31,92                | 13,97                | 100                  | 31,42                | 38,81                           | 44,38              |
|                     | CATA            | AFUA_6G03890                         | 38,84              | 16,07              | 36,71              | 83,06              | 32,18                | 40,18                | 15,67                | 31,42                | 100                  | 30,29                           | 36,32              |
|                     | putative<br>CAT | AFUA_2G00200                         | 32,42              | 16,52              | 38,66              | 31,06              | 32,03                | 32,32                | 14,87                | 38,81                | 30,29                | 100                             | 39,29              |
| <i>C. albicans</i>  | CAT1            | Ca                                   | 35,6               | 14,36              | 60,46              | 38,64              | 41,87                | 36,32                | 13,88                | 44,38                | 36,32                | 39,29                           | 100                |

753

754 **Table S5. AmB treatment differentially affects expression of SOD- and CAT-encoding genes in**  
 755 ***A. terreus* ATS and ATR.** Cultures (ATS, n=3; ATR, n=3) were incubated in RPMI1640 liquid  
 756 media for 24 h at 37° C and 200 rpm. AmB (1 µg/ml) was added for 1h and 4 h, respectively. Gene  
 757 expression during AmB treatment was determined by real-time RT-qPCR and expression was  
 758 normalized to beta-tubulin according to the  $2^{-\Delta\Delta CT}$  method. Data are represented as mean  $\pm$  standard  
 759 deviation from three independent experiments with three ATS and three ATR isolates per  
 760 experiment, respectively in technical duplicates.

|               |            | 1h AmB          |                 | 4h AmB          |                  |
|---------------|------------|-----------------|-----------------|-----------------|------------------|
| gene          | locus tag  | ATS             | ATR             | ATS             | ATR              |
| <i>sod1</i>   | ATEG_06543 | 3.16 $\pm$ 0.68 | 1.47 $\pm$ 0.34 | 5.03 $\pm$ 0.73 | 1.08 $\pm$ 0.16  |
| <i>sod2</i>   | ATEG_03920 | 1.13 $\pm$ 0.10 | 2.03 $\pm$ 0.06 | 1.53 $\pm$ 0.15 | 2.40 $\pm$ 0.40  |
| <i>sod3</i>   | ATEG_00657 | 1.58 $\pm$ 0.51 | 2.31 $\pm$ 0.09 | 0.78 $\pm$ 0.11 | 1.09 $\pm$ 0.28  |
| <i>sod4</i>   | ATEG_03712 | 0.93 $\pm$ 0.13 | 0.53 $\pm$ 0.10 | 1.33 $\pm$ 0.31 | 0.48 $\pm$ 0.09  |
| <i>sod5</i>   | ATEG_09123 | 1.86 $\pm$ 0.52 | 0.77 $\pm$ 0.12 | 4.37 $\pm$ 1.85 | 1.97 $\pm$ 0.68  |
| <i>sod6</i>   | ATEG_00356 | 1.26 $\pm$ 0.98 | 0.74 $\pm$ 0.68 | 7.01 $\pm$ 3.25 | 1.08 $\pm$ 0.68  |
| <i>sod7</i>   | ATEG_04404 | 0.42 $\pm$ 0.05 | 0.40 $\pm$ 0.07 | 4.20 $\pm$ 0.40 | 0.88 $\pm$ 0.25  |
| <i>cat1</i>   | ATEG_07477 | 3.34 $\pm$ 0.56 | 2.52 $\pm$ 0.75 | 9.58 $\pm$ 0.40 | 27.55 $\pm$ 2.69 |
| <i>cat2</i>   | ATEG_08422 | 1.61 $\pm$ 0.54 | 2.65 $\pm$ 0.54 | 4.53 $\pm$ 1.93 | 43.71 $\pm$ 9.46 |
| <i>catC</i>   | ATEG_01487 | 1.26 $\pm$ 0.32 | 1.20 $\pm$ 0.29 | 4.01 $\pm$ 0.97 | 2.55 $\pm$ 0.58  |
| <i>catA</i>   | ATEG_00794 | 2.73 $\pm$ 1.19 | 1.27 $\pm$ 0.14 | 4.66 $\pm$ 2.09 | 5.53 $\pm$ 1.04  |
| <i>percat</i> | ATEG_07460 | 2.35 $\pm$ 0.43 | 0.92 $\pm$ 0.13 | 4.13 $\pm$ 0.75 | 3.44 $\pm$ 1.33  |

761

762 **Table S6.** Radial growth assays using the CAT and SOD inhibitors 3-AT and DDC. 100 conidia  
 763 were point inoculated and growth diameter was measured. Results are given as percent of the control  
 764 conditions. Experiments were performed with 3 ATS and 3 ATR and repeated 3 times.

|                | Radial growth [percent untreated control] |                 | Ratio   |
|----------------|-------------------------------------------|-----------------|---------|
|                | ATS                                       | ATR             | ATR/ATS |
| <b>control</b> | 100,00 ± 8,18                             | 100,00 ± 6,90   | 1,00    |
| <b>3-AT</b>    |                                           |                 |         |
| [100 µM]       | 98,20 ± 5,56                              | 93,10 ± 5,19    | 0,95    |
| [500 µM]       | 96,40 ± 6,51                              | 93,10 ± 5,19    | 0,97    |
| [1 mM]         | 96,40 ± 6,51                              | 82,76 ± 11,75   | 0,86    |
| [2 mM]         | 85,49 ± 18,44                             | 79,31 ± 18,43   | 0,93    |
| [4 µM]         | 58,21 ± 5,44 *                            | 65,52 ± 7,47 *  | 1,13    |
| <b>DDC</b>     |                                           |                 |         |
| [12.5 µM]      | 94,54 ± 3,35                              | 100,00 ± 4,83   | 1,06    |
| [25 µM]        | 74,58 ± 4,24 *                            | 93,10 ± 5,19    | 1,25    |
| [50 µM]        | 78,18 ± 4,05 *                            | 84,14 ± 5,74    | 1,08    |
| [100 µM]       | 56,36 ± 5,61 *                            | 51,72 ± 47,07 * | 0,92    |

765
